# Supplementary material
Source: publisher figshare collection journal article supplement (https://rs.figshare.com/ndownloader/files/30405558)
Supplement: Supplementary file 1 [file 30405558]

## Sheet: C & N Data
d13C	d15N	Size (mm)	Region Code_All	Preservation_Primary Analysis	d13C	d15N	Preservation Comparison
-16.3393	14.4377	130	A	Ethanol
-17.1464	13.5071	140	A	Ethanol
-16.8007	13.9919	150	A	Ethanol
-16.9073	14.0545	145	A	Ethanol
-17.5005	12.352	140	A	Ethanol
-16.9174	14.0005	140	A	Ethanol
-16.7694	14.4808	145	A	Ethanol
-16.404	14.5248	145	A	Ethanol
-16.0375	14.7015	150	A	Ethanol
-16.4969	14.6072	135	A	Ethanol
-17.0284	14.2773	150	A	Ethanol
-16.4359	14.4578	160	A	Ethanol
-16.9754	14.3016	140	A	Ethanol
-16.6751	14.4785	135	A	Ethanol
-16.8345	14.3782	140	A	Ethanol
-17.095	14.4284	135	A	Ethanol
-16.4128	14.3609	145	A	Ethanol
-17.3545	14.2016	150	A	Ethanol
-16.6308	14.0567	170	A	Ethanol
-16.6057	14.669	135	A	Ethanol
-17.7314	12.905	133	B	Freeze Dried	-17.5525	12.87	Ethanol
-17.4683	13.3243	115	B	Freeze Dried	-17.5211	13.2	Ethanol
-17.7678	13.2	115	B	Freeze Dried	-17.6177	13.33	Ethanol
-18.1336	13.4871	118	B	Freeze Dried	-17.9392	13.55	Ethanol
-18.012	13.413	116	B	Freeze Dried	-17.9456	13.62	Ethanol
-17.9445	13.0059	128	B	Freeze Dried	-17.7983	13.06	Ethanol
-17.3478	13.305	114	B	Freeze Dried	-17.4791	13.43	Ethanol
-17.1446	13.48	115	B	Freeze Dried	-17.4825	13.5	Ethanol
-17.9651	13.0219	110	B	Freeze Dried	-17.6436	13.33	Ethanol
-17.5585	13.3724	112	B	Freeze Dried	-17.499	12.93	Ethanol
-17.9738	12.9308	116	B	Freeze Dried	-17.9805	12.76	Ethanol
-18.072	13.3593	116	B	Freeze Dried	-18.1445	13.731	Ethanol
-17.4595	13.7144	117	B	Freeze Dried	-17.7397	13.6	Ethanol
-17.7339	12.8695	111	B	Freeze Dried	-17.6901	12.77	Ethanol
-17.8125	13.2637	116	B	Freeze Dried	-17.7635	13.7063	Ethanol
-17.8009	12.8405	121	B	Freeze Dried	-17.6029	13.4664	Ethanol
-16.6708	11.9472	123	B	Freeze Dried	-17.6038	12.17	Ethanol
-17.6076	12.8268	142	B	Freeze Dried	-17.8477	12.75	Ethanol
-17.573	12.6286	120	B	Freeze Dried	-17.557	12.48	Ethanol
-17.4013	12.4834	109	B	Freeze Dried	-17.657	12.51	Ethanol
-17.652	12.4821	152	B	Freeze Dried
-17.3329	12.3675	145	B	Freeze Dried
-17.4238	12.2729	138	B	Freeze Dried
-17.668	12.8269	124	B	Freeze Dried
-17.9311	12.3283	119	B	Freeze Dried
-17.7501	12.1808	144	B	Freeze Dried
-17.3073	12.399	110	B	Freeze Dried
-17.9963	13.0811	117	B	Freeze Dried
-17.8201	13.1728	114	B	Freeze Dried
-17.5829	12.5675	127	B	Freeze Dried
-17.585	12.7666	130	B	Freeze Dried
-17.5615	12.8972	122	B	Freeze Dried
-17.3325	12.8566	118	B	Freeze Dried
-17.5302	12.5995	116	B	Freeze Dried
-17.8397	13.0052	114	B	Freeze Dried
-17.9327	12.9937	108	B	Freeze Dried
-17.4045	12.5972	121	B	Freeze Dried
-17.7192	12.9586	135	B	Freeze Dried
-17.5501	12.5078	113	B	Freeze Dried
-17.6223	12.5282	122	B	Freeze Dried
-17.7381	12.7026	143	B	Freeze Dried
-17.8079	12.9778	112	B	Freeze Dried
-17.6273	13.1577	125	B	Freeze Dried
-17.554	12.5913	116	B	Freeze Dried
-17.8948	12.9661	129	B	Freeze Dried
-17.5578	13.4716	108	B	Freeze Dried
-17.2246	12.5263	108	B	Freeze Dried
-17.4859	12.8401	128	B	Freeze Dried
-17.4391	12.9916	113	B	Freeze Dried
-17.3092	13.4932	143	B	Freeze Dried
-17.6351	12.1813	125	B	Freeze Dried
-17.5911	13.2496	135	B	Freeze Dried
-17.5491	12.4789	120	B	Freeze Dried
-17.7464	12.6131	110	B	Freeze Dried
-17.3093	12.618	108	B	Freeze Dried
-17.5213	12.9733	110	B	Freeze Dried
-17.5531	12.8523	112	B	Freeze Dried
-17.7168	12.1082	113	B	Freeze Dried
-17.8034	12.5743	125	B	Freeze Dried
-17.5575	13.0792	111	B	Freeze Dried
-17.9928	12.5002	100	B	Freeze Dried
-17.8544	12.4491	117	B	Freeze Dried
-17.5825	12.5794	119	B	Freeze Dried
-17.2474	12.7562	120	B	Freeze Dried
-16.3158	11.5522	108	C	Ethanol
-17.4335	11.3071	123	C	Ethanol
-16.6375	12.4627	99	C	Ethanol
-16.3621	11.4015	112	C	Ethanol
-14.7701	12.2887	18	C	Ethanol
-14.7465	12.3101	23	C	Ethanol
-14.2899	12.6619	33	C	Ethanol
-14.3528	12.8713	39	C	Ethanol
-15.6541	12.6283	93	C	Ethanol
-15.5958	11.3154	110	C	Ethanol
-15.4114	9.33057	108	C	Ethanol
-16.8506	11.3975	139	C	Ethanol
-16.7439	11.4351	127	C	Ethanol
-16.2878	11.6044	153	C	Ethanol
-14.8733	12.8087	64	C	Ethanol
-16.217	12.4869	61	C	Ethanol
-15.2418	11.7884	65	C	Ethanol
-16.4459	12.2315	52	C	Ethanol
-15.0547	12.4363	69	C	Ethanol
-14.8298	12.5263	64	C	Ethanol
-14.7682	12.3849	58	C	Ethanol
-15.3209	11.943	60	C	Ethanol
-14.9291	12.4065	59	C	Ethanol
-13.4364	12.5028	75	D	Ethanol
-10.9444	12.1786	55	D	Ethanol
-14.1188	11.9005	75	D	Ethanol
-12.5326	12.7039	60	D	Ethanol
-12.3751	12.5495	55	D	Ethanol
-14.4805	11.8913	120	D	Ethanol
-15.2839	12.3209	95	D	Ethanol
-14.4116	11.7458	100	D	Ethanol
-14.0256	12.3345	100	D	Ethanol
-13.7484	11.4487	90	D	Ethanol
-13.2566	11.7373	85	D	Ethanol
-12.4403	12.1502	75	D	Ethanol
-12.1605	12.7218	75	D	Ethanol
-11.7057	13.004	75	D	Ethanol
-13.894	11.7029	80	D	Ethanol
-14.9238	11.8712	75	D	Ethanol
-12.3338	12.8938	70	D	Ethanol
-14.4232	11.9574	85	D	Ethanol
-12.7285	12.1051	70	D	Ethanol
-12.556	12.7267	75	D	Ethanol
-16.6384	12.7787	110	E	Ethanol	-16.2846	12.5034	Freeze Dried
-17.2594	12.7254	115	E	Ethanol	-18.0532	12.3382	Freeze Dried
-16.1909	10.937	78	E	Ethanol	-17.8433	11.3649	Freeze Dried
-15.9621	12.2552	107	E	Ethanol	-16.3427	12.9441	Freeze Dried
-17.232	12.0686	102	E	Ethanol	-17.3857	12.2549	Freeze Dried
-16.939	12.5988	105	E	Ethanol	-17.1989	12.3442	Freeze Dried
-16.8216	12.7776	74	E	Ethanol	-17.6365	12.0167	Freeze Dried
-16.0918	11.4114	103	E	Ethanol	-16.4601	12.0588	Freeze Dried
-17.6738	10.3609	125	E	Ethanol	-17.5877	10.8131	Freeze Dried
-17.1894	14.0295	110	E	Ethanol	-16.4467	13.6155	Freeze Dried
-16.5778	13.8755	85	E	Ethanol	-17.7317	10.4809	Freeze Dried
-17.0032	11.342	126	E	Ethanol	-17.0432	12.164	Freeze Dried
-16.5469	12.293	113	E	Ethanol	-16.0543	12.4838	Freeze Dried
-17.2757	12.4377	73	E	Ethanol	-17.0198	12.2425	Freeze Dried
-16.2931	12.6189	115	E	Ethanol	-16.8095	12.7915	Freeze Dried
-16.8524	12.629	144	E	Ethanol	-16.9584	12.9936	Freeze Dried
-15.7613	12.2933	126	E	Ethanol	-15.7421	12.2252	Freeze Dried
-16.3245	12.6442	115	E	Ethanol	-15.9985	13.0429	Freeze Dried
-16.9403	13.2369	143	E	Ethanol	-17.0724	12.4624	Freeze Dried
-16.7128	12.7457	95	E	Ethanol
-16.9566	9.79579	105	F	Freeze Dried
-16.1024	9.69297	99	F	Freeze Dried
-16.3301	9.92968	107	F	Freeze Dried
-16.4838	9.82677	96	F	Freeze Dried
-16.6546	10.1931	91	F	Freeze Dried
-17.1723	10.7136	99	F	Freeze Dried
-16.691	10.5249	81	F	Freeze Dried
-16.7585	10.278	89	F	Freeze Dried
-16.347	10.2934	101	F	Freeze Dried
-16.663	10.0472	88	F	Freeze Dried
-16.3607	10.3067	82	F	Freeze Dried
-16.5488	10.1647	89	F	Freeze Dried
-16.5098	9.86959	90	F	Freeze Dried
-16.8723	10.1521	86	F	Freeze Dried
-16.5457	10.001	94	F	Freeze Dried
-16.4925	10.4738	79	F	Freeze Dried
-16.5949	10.0122	86	F	Freeze Dried
-16.3585	9.72338	88	F	Freeze Dried
-16.6533	10.5691	99	F	Freeze Dried
-16.5024	9.981	96	F	Freeze Dried
-16.3412	10.7943	65	G	Ethanol
-16.5653	10.7635	70	G	Ethanol
-16.5888	11.7155	65	G	Ethanol
-16.1921	11.2784	70	G	Ethanol
-15.2787	11.971	70	G	Ethanol
-16.8239	10.0315	50	G	Ethanol
-16.702	10.1277	55	G	Ethanol
-15.652	9.9743	60	G	Ethanol
-16.3182	10.7574	50	G	Ethanol
-15.3405	11.4043	60	G	Ethanol
-16.618	10.9146	45	G	Ethanol
-16.4361	11.8082	60	G	Ethanol
-16.3103	11.7816	45	G	Ethanol
-16.4219	10.3353	60	G	Ethanol
-16.6211	10.9481	60	G	Ethanol
-16.4681	10.6796	55	G	Ethanol
-16.3069	10.0998	60	G	Ethanol
-16.7113	11.9396	60	G	Ethanol
-16.572	10.4274	55	G	Ethanol
-16.2548	10.241	55	H	Ethanol
-17.0272	10.4234	45	H	Ethanol
-16.6455	10.9947	55	H	Ethanol
-16.7292	10.3115	50	H	Ethanol
-16.2355	9.55651	50	H	Ethanol
-16.8479	11.3177	45	H	Ethanol
-16.7698	10.3801	45	H	Ethanol
-16.241	10.7705	50	H	Ethanol
-16.0944	11.3207	60	H	Ethanol
-15.0323	10.3592	60	H	Ethanol
-16.0532	11.6581	55	H	Ethanol
-16.2262	10.9037	50	H	Ethanol
-16.816	10.0997	50	H	Ethanol
-15.5532	11.7252	55	H	Ethanol
-16.0964	10.5622	50	H	Ethanol
-15.1514	12.491	50	H	Ethanol
-16.7048	11.0258	60	H	Ethanol
-16.7586	10.9479	127	I	Ethanol
-14.5378	10.0534	102	I	Ethanol
-16.368	10.3732	112	I	Ethanol
-17.6151	9.34505	77	I	Ethanol
-14.5706	9.64811	77	I	Ethanol
-15.7491	10.7389	94	I	Ethanol
-15.6818	10.5337	87	I	Ethanol
-15.2577	10.9771	78	I	Ethanol
-15.9188	10.5636	80	I	Ethanol
-16.0775	8.85564	102	I	Ethanol
-15.8969	7.68985	107	I	Ethanol
-16.0398	10.1551	115	I	Ethanol
-15.7954	8.50156	110	I	Ethanol
-16.9363	9.763	125	I	Ethanol
-15.427	8.95505	100	I	Ethanol
-15.6457	8.88156	115	I	Ethanol
-16.4278	9.96523	116	I	Ethanol
-16.5657	9.89331	125	I	Ethanol
-16.9837	9.97578	115	I	Ethanol
-13.0417	8.62977	95	J	Ethanol
-15.0431	9.46612	105	J	Ethanol
-11.16	9.82117	103	J	Ethanol
-16.4451	9.91125	122	J	Ethanol
-11.1754	7.80756	85	J	Ethanol
-16.7349	9.88446	93	J	Ethanol
-18.0294	9.50418	75	J	Ethanol
-15.8435	9.70801	83	J	Ethanol
-16.5978	9.74284	116	K	Ethanol
-17.4007	9.87922	106	K	Ethanol
-17.1199	9.23884	82	K	Ethanol
-17.1934	9.34147	105	K	Ethanol
-17.5222	9.79613	89	K	Ethanol
-15.7534	8.03421	90	K	Ethanol
